# Supplementary material for: Transcriptome analysis of Asparagus officinalis reveals genes involved in the biosynthesis of rutin and protodioscin
Source: PLoS One. 2019 Jul 22;14(7):e0219973. doi: 10.1371/journal.pone.0219973 (PMC6645489; doi:10.1371/journal.pone.0219973)
Supplement: S2 Table — (XLSX) [file pone.0219973.s002.xlsx]

## Sheet: Table S2
Table S2. Gene annotations based on the NR, EGGNOG, KO and UniprotKB databases.
DB	Putative genes	Percent (%)
NR	89418	49.21
EGGNOG	90160	49.62
KO(KEGG Orthology)	83431	45.91
UniprotKB	70098	38.58
